# Supplementary material
Source: PubMed Central journal article supplement (PMC3726044)
Supplement: NIHMS470512-supplement-1_si_001.pdf [file NIHMS470512-supplement-1_si_001.pdf]

Supplementary Figures

*Mycobacterium tuberculosis* utilizes a unique  
heterotetrameric structure for dehydrogenation  
of the cholesterol side chain

*Suzanne T. Thomas<sup>±</sup>, Nicole S. Sampson<sup>±\*</sup>*

\*Department of Chemistry, Stony Brook University, Stony Brook, New York 11794

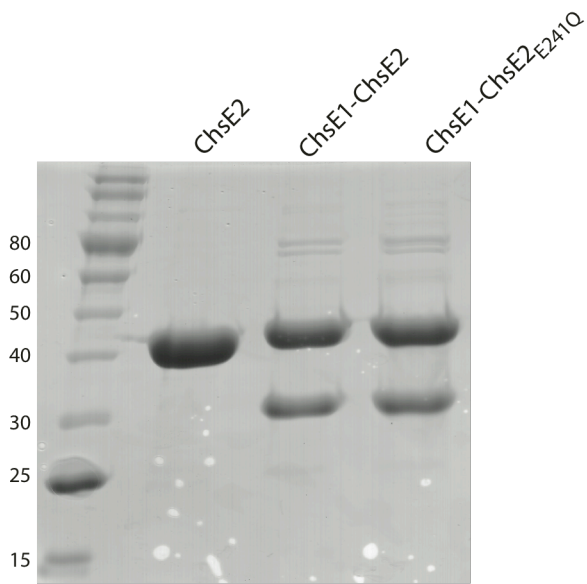

**Figure S1. SDS-PAGE of purified proteins studied in this work.** 10  $\mu$ g of each protein sample was analyzed under denaturing conditions on a 15% SDS-PAGE. The gel was stained with coomassie blue.

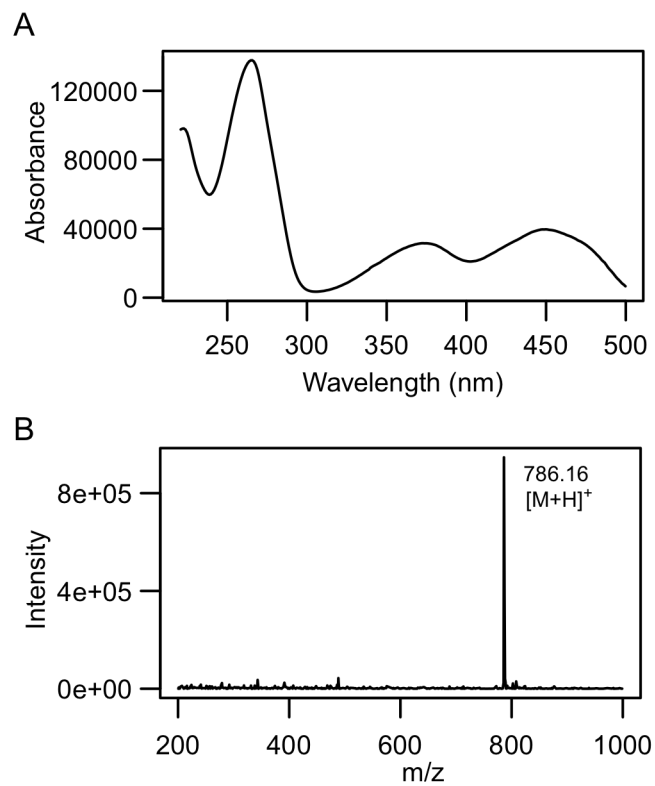

**Figure S2. LC/UV/MS of isolated flavin from ChsE1-ChsE2.** Isolated flavin from ChsE1-ChsE2 was analyzed by LC/UV/MS. The absorbance spectrum (**A**) and ESI+ MS (**B**) confirmed that ChsE1-ChsE2 was purified with noncovalently bound flavin adenine dinucleotide (FAD).

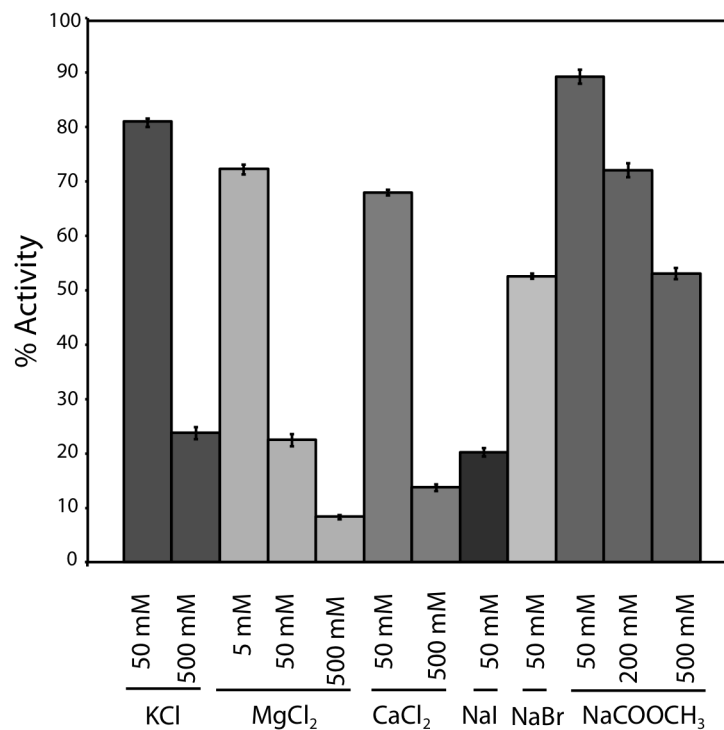

**Figure S3. Salt dependence on dehydrogenase activity.** ChsE1-ChsE2 was assayed in 100 mM TAPS buffer pH 8.5 with 50  $\mu$ M of CoA thioester **1** and 250  $\mu$ M ferricinium hexafluorophosphate. Initial rate data was determined from the reduction of ferricinium hexafluorophosphate at 300 nm. Each assay was conducted in triplicate and shown is the average % activity compared to without salt. The error represents the standard deviation of the measurement.
